# Supplementary material for: Global gene expression analysis in etiolated and de-etiolated seedlings in conifers
Source: PubMed Central journal article supplement (PMC6611632; doi:10.1371/journal.pone.0219272), 2019-07-05

**Fig A**

**(a)**

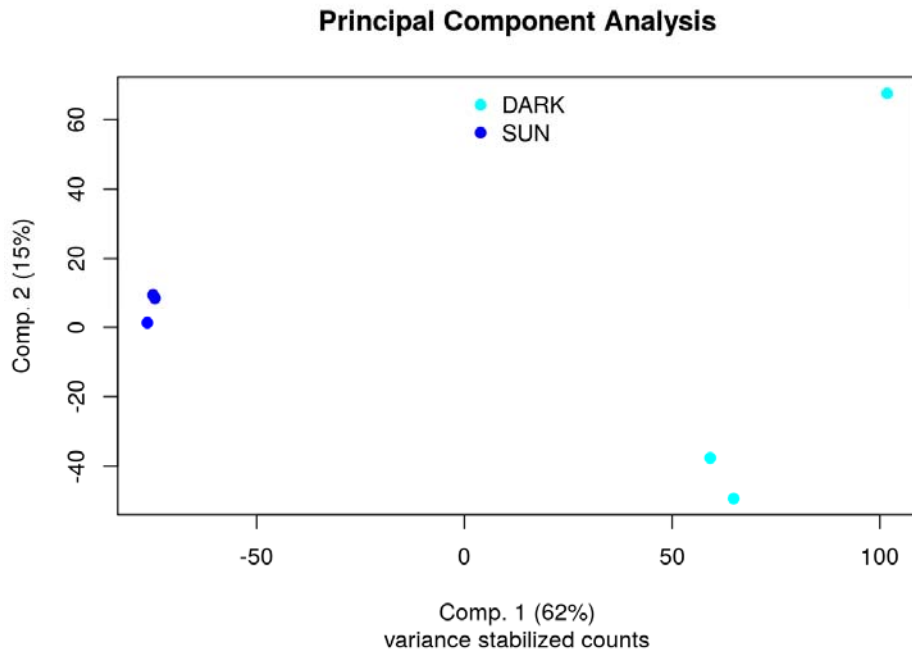

**(b)**

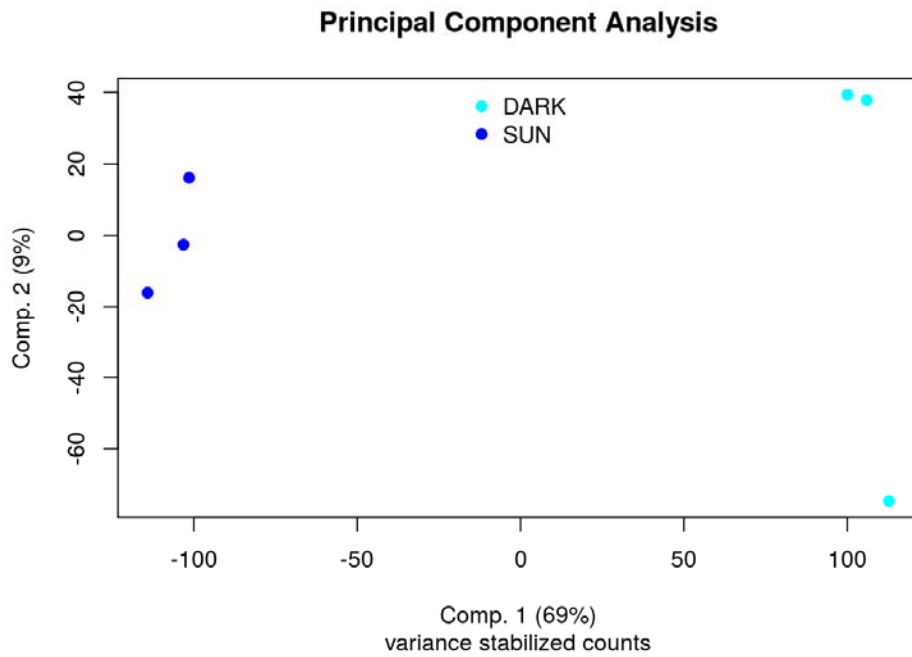

**Fig B**

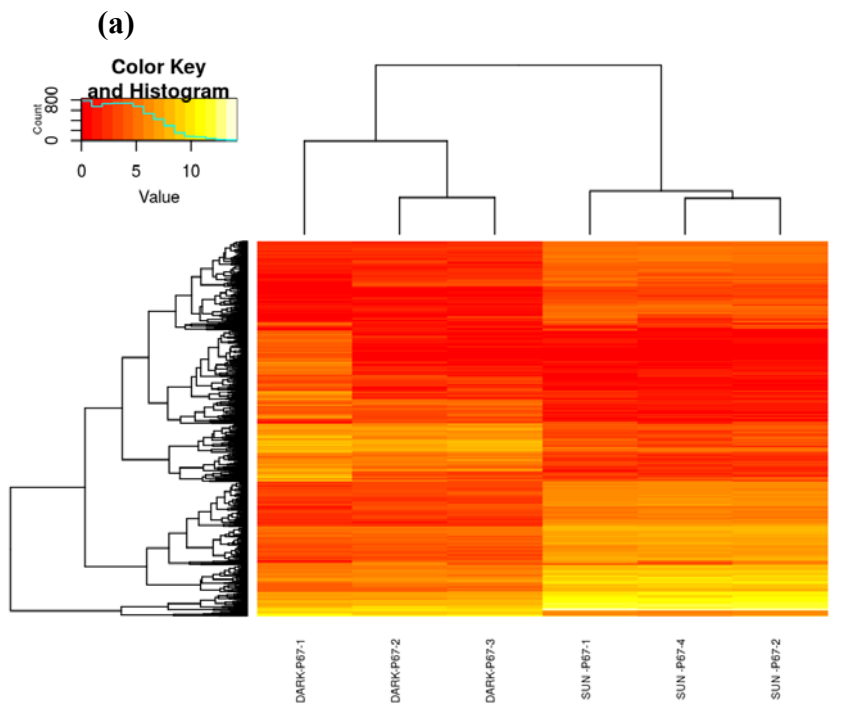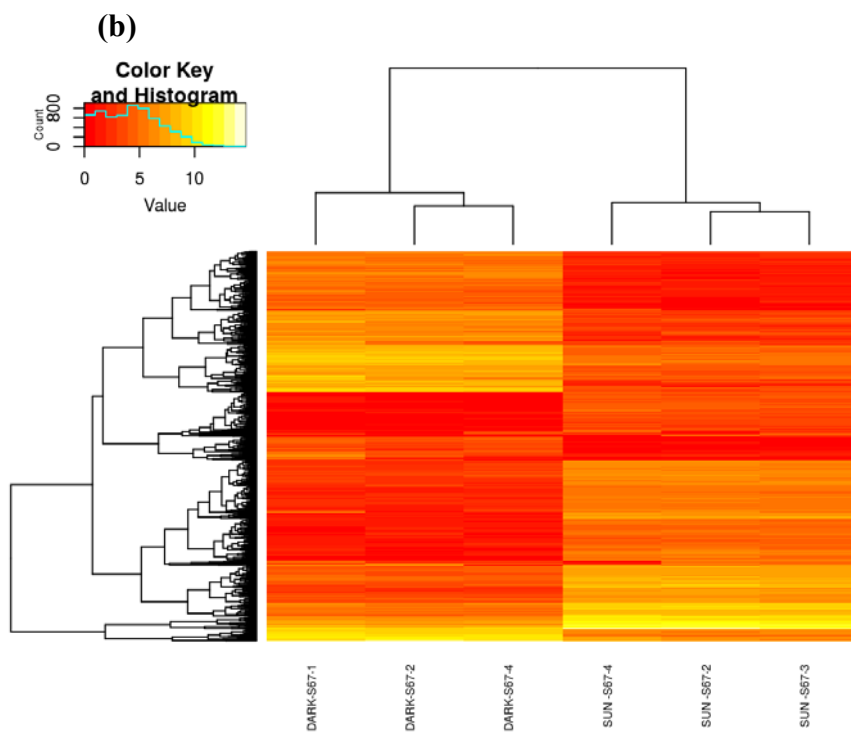

**Fig C**

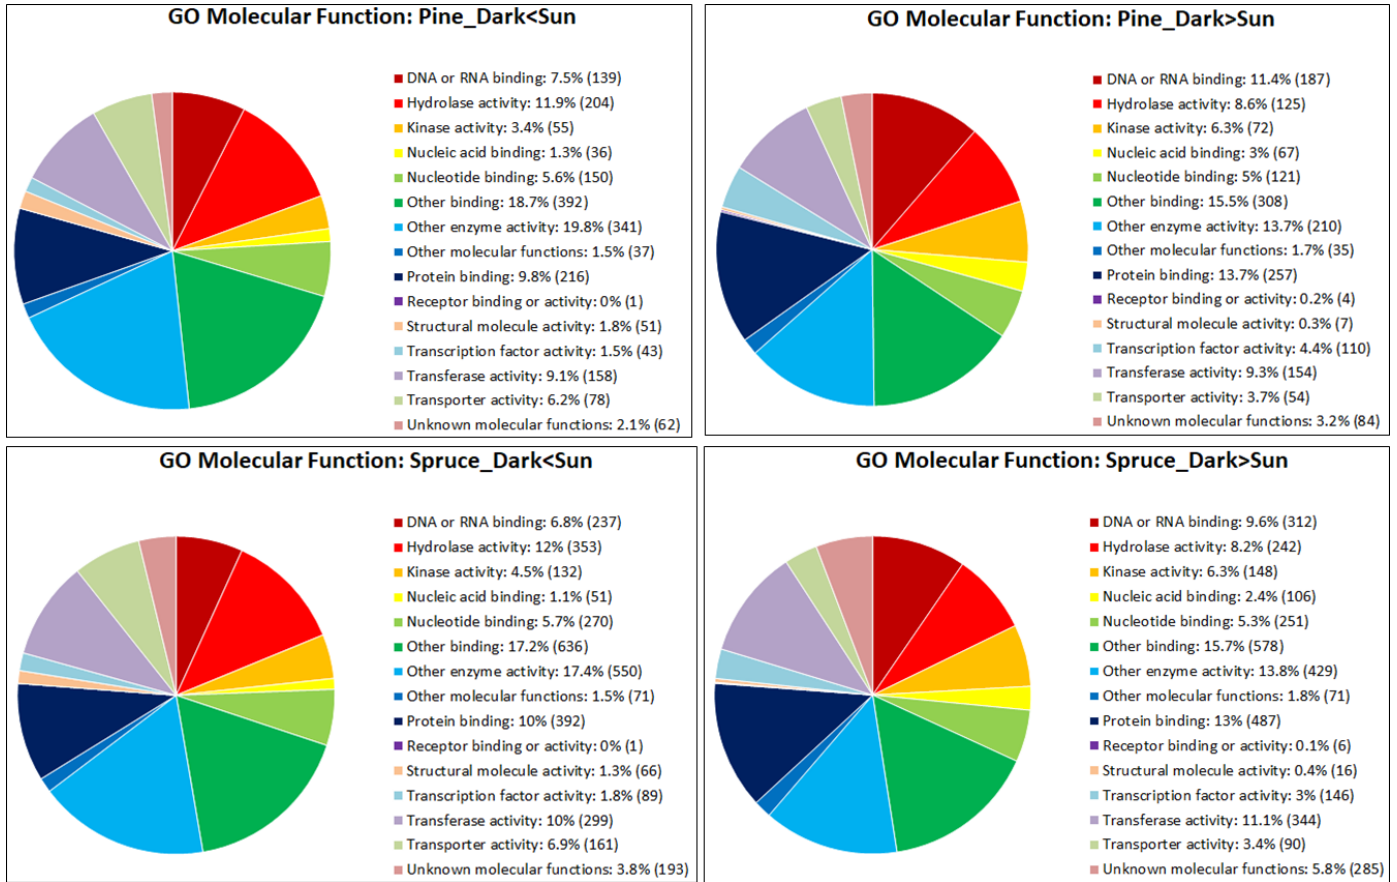

**Fig D**

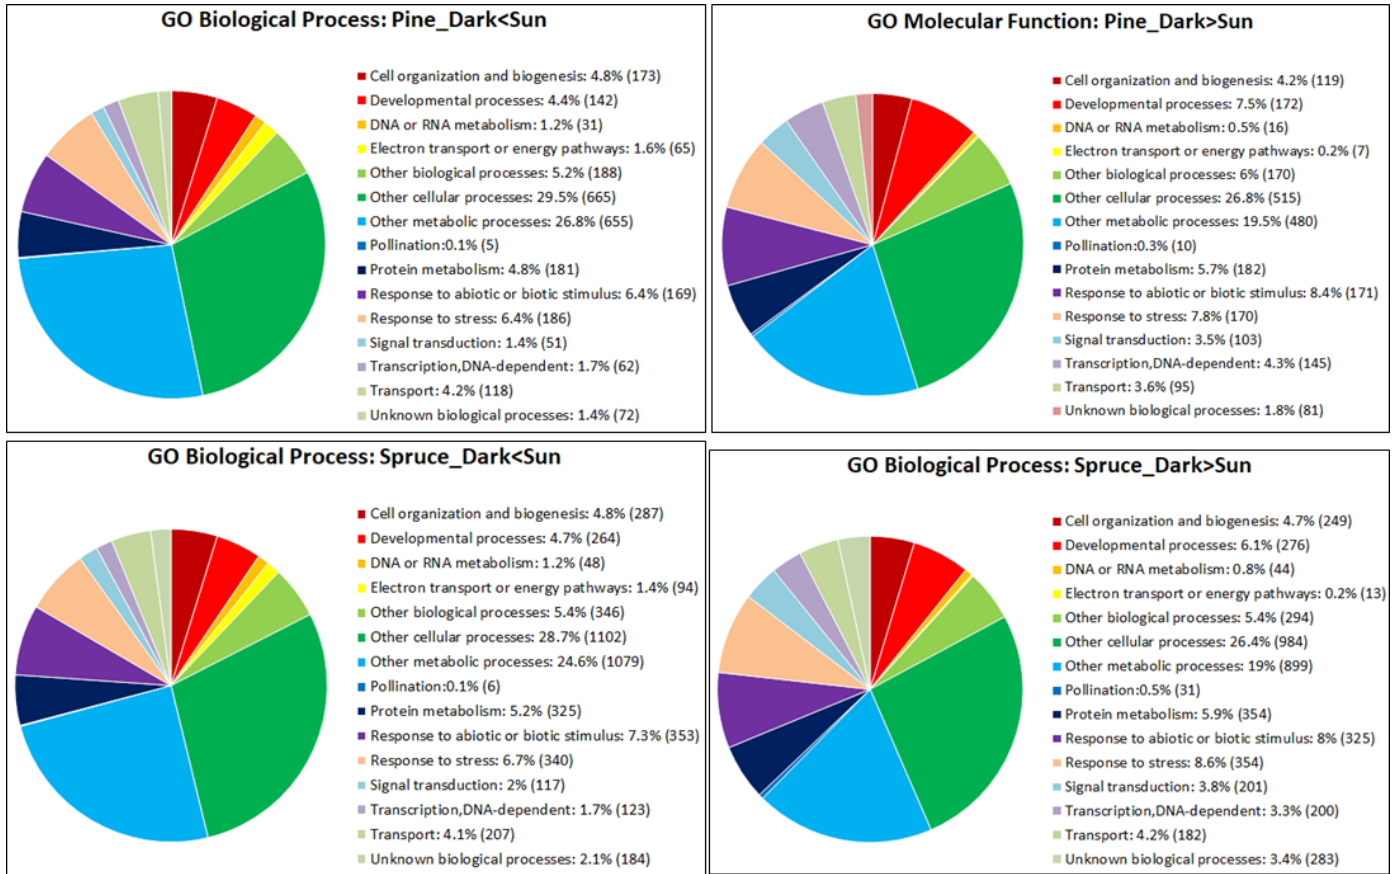

**Fig E**

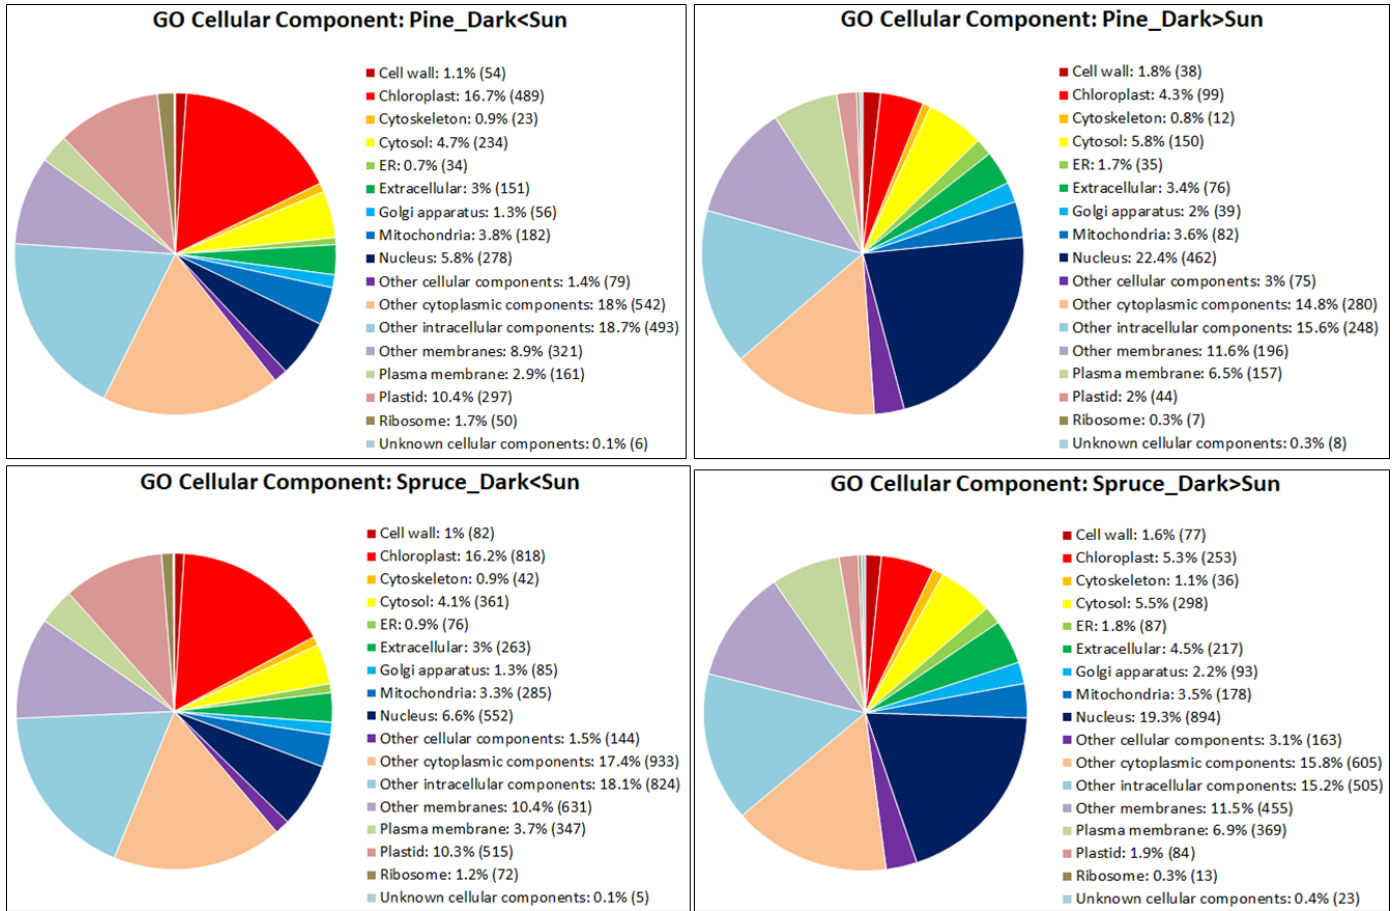

Supplement: pone.0219272.s002.pdf [file pone.0219272.s002.pdf]
