# Supplementary material for: Global gene expression analysis in etiolated and de-etiolated seedlings in conifers
Source: PubMed Central journal article supplement (PMC6611632; doi:10.1371/journal.pone.0219272), 2019-07-05

**Fig A**

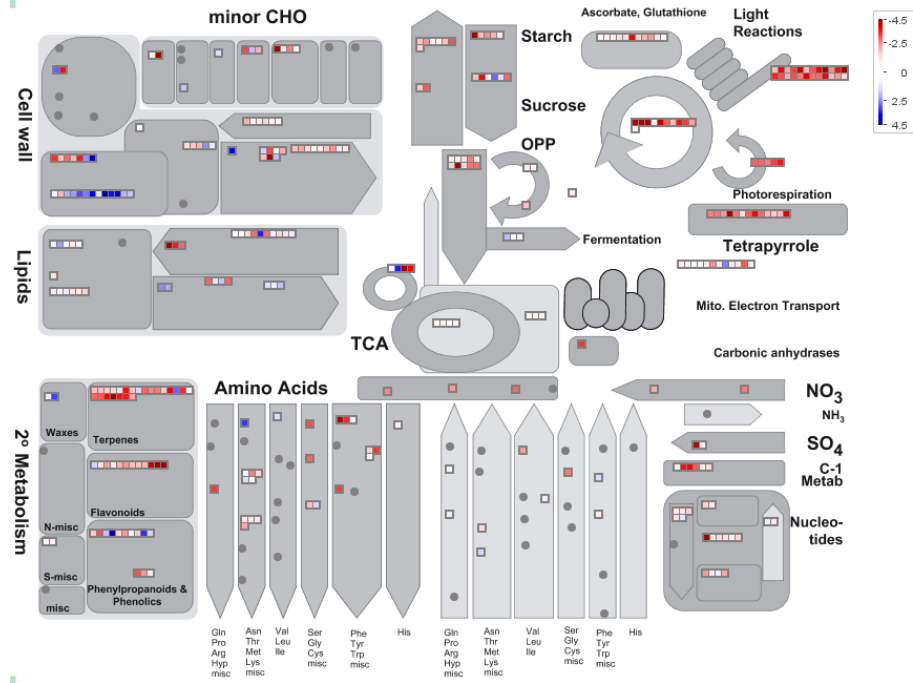

**Fig B**

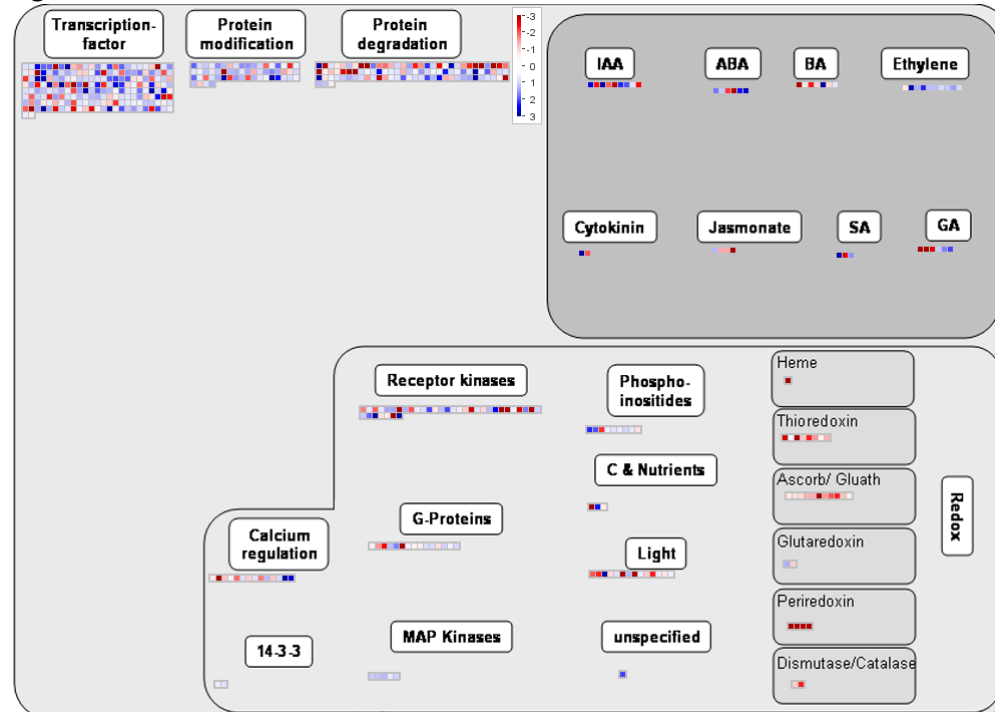

Fig C

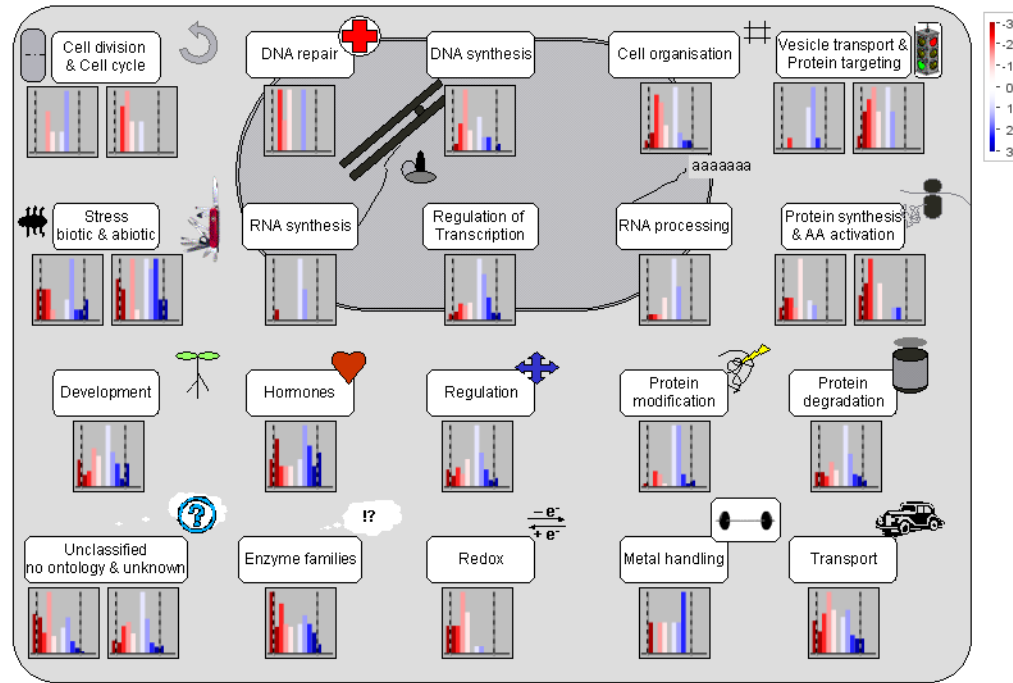

Fig D

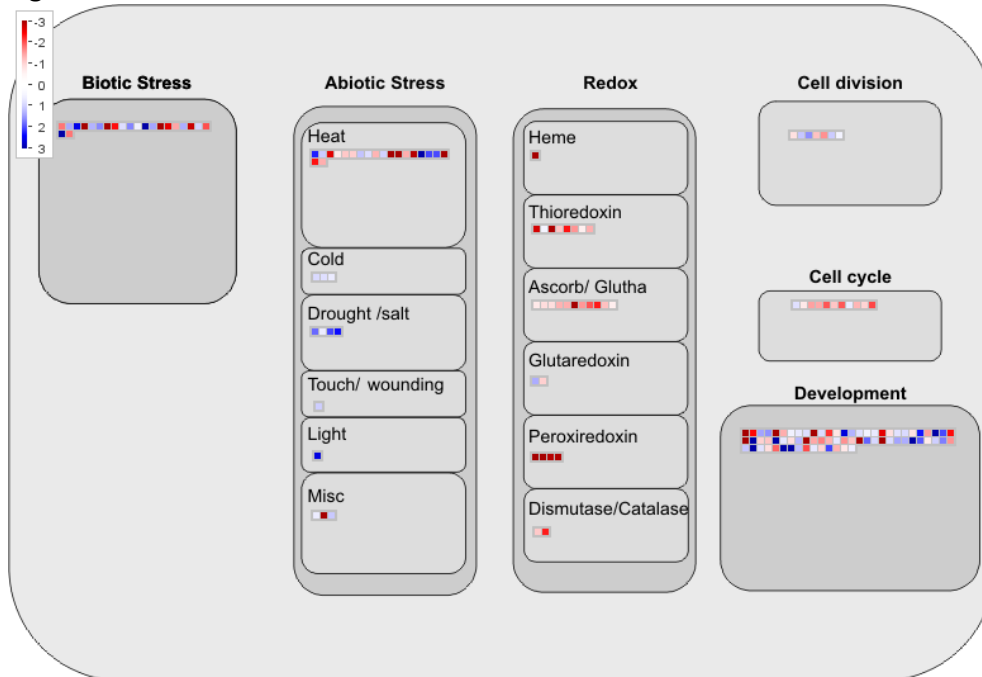

Fig E

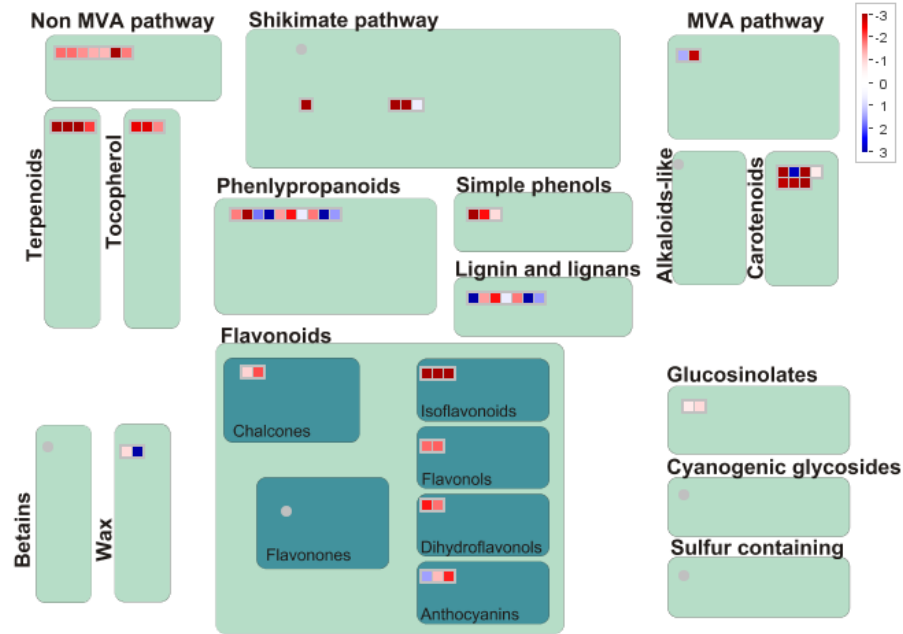

Fig F

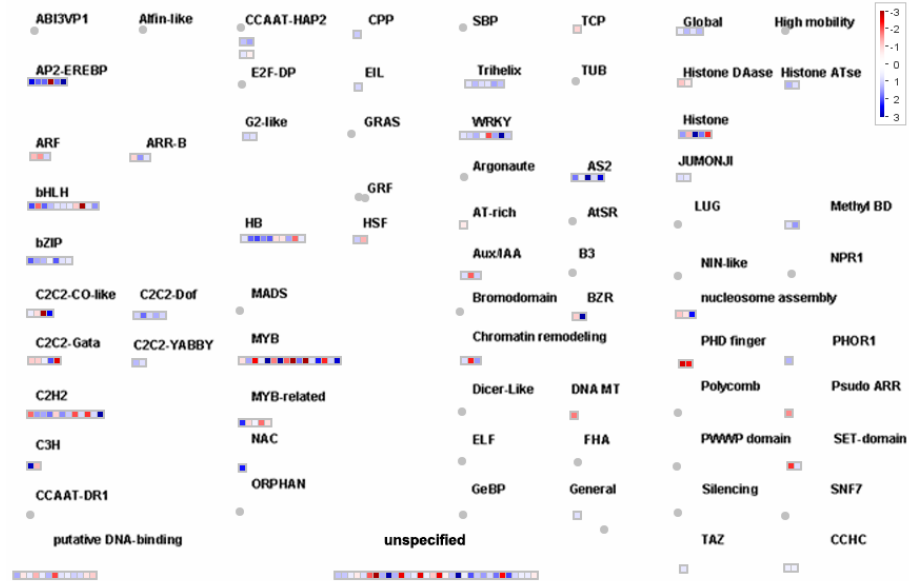

Fig G

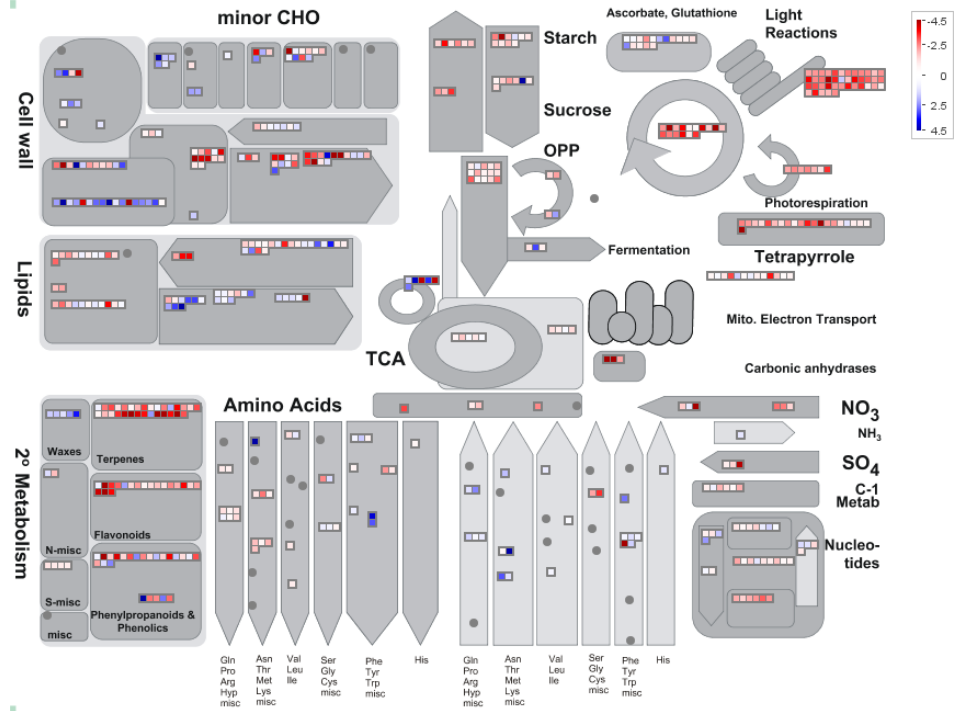

Fig H

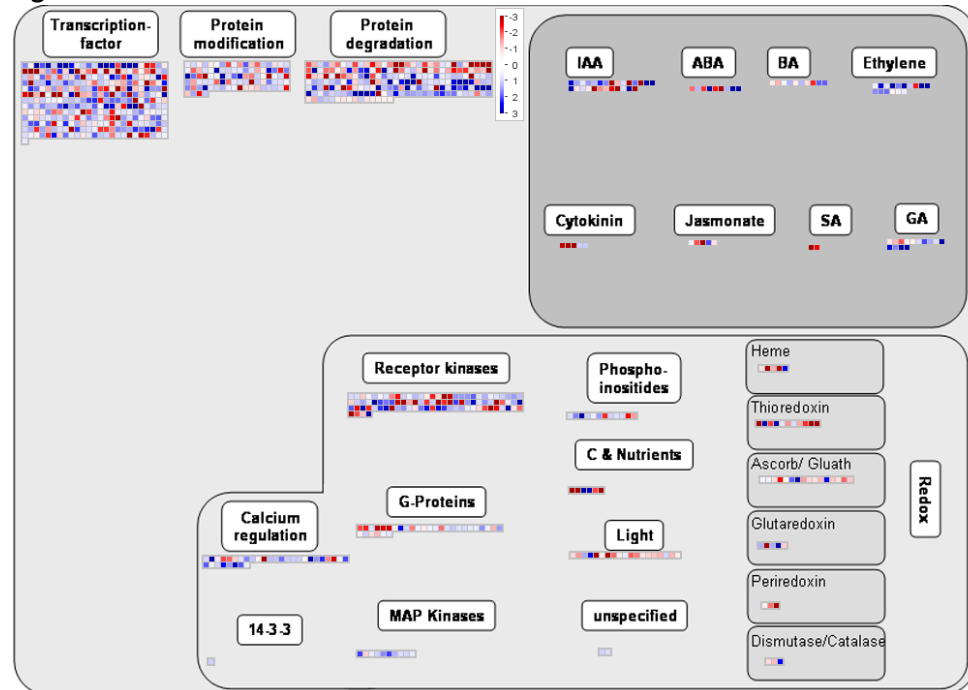

Fig I

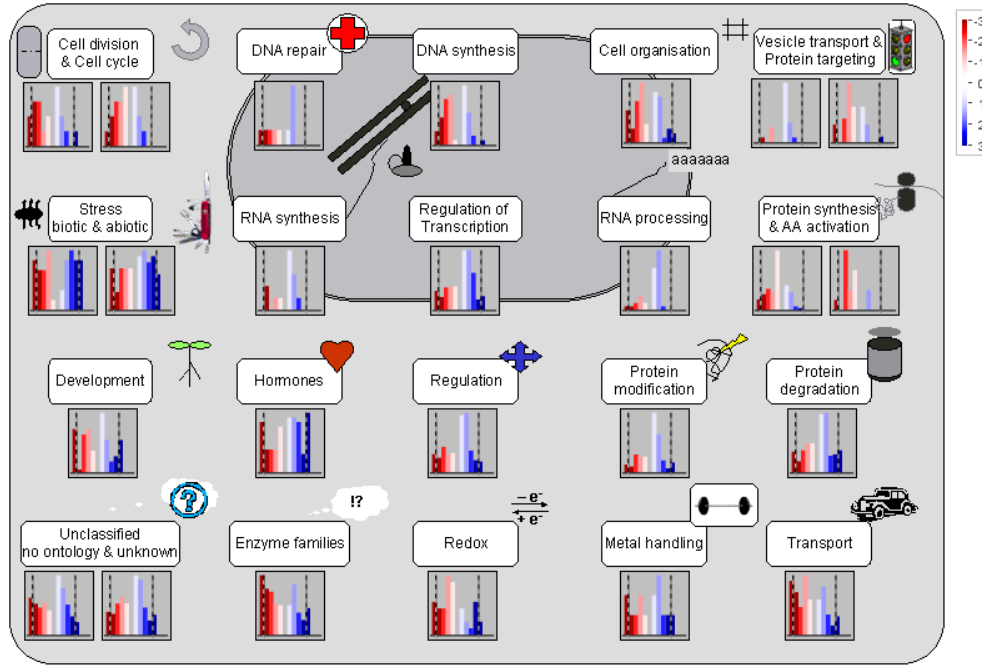

Fig J

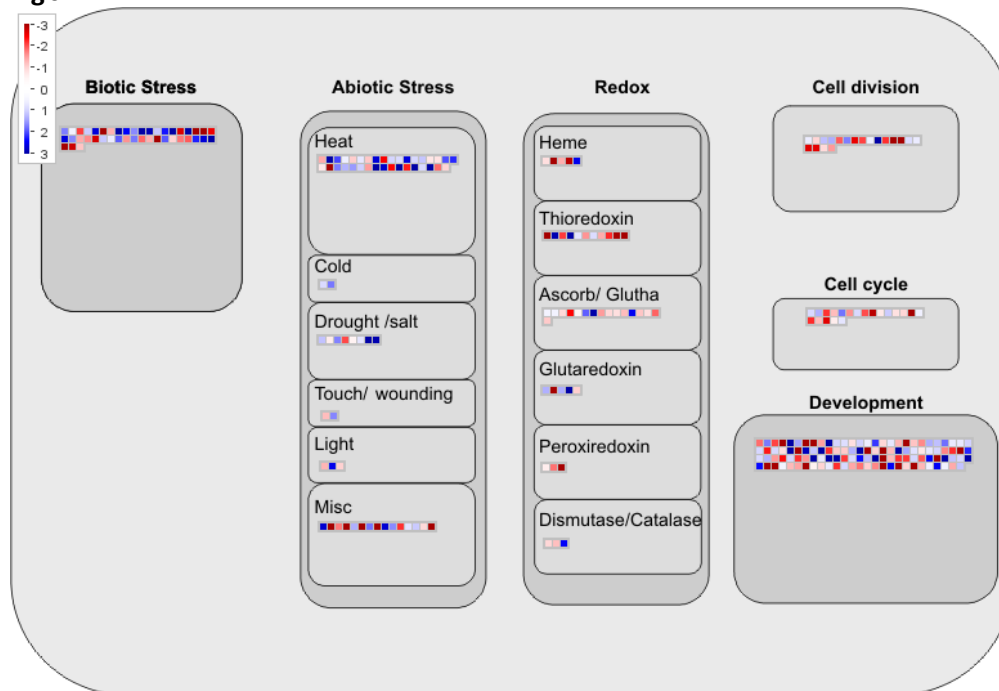

Fig K

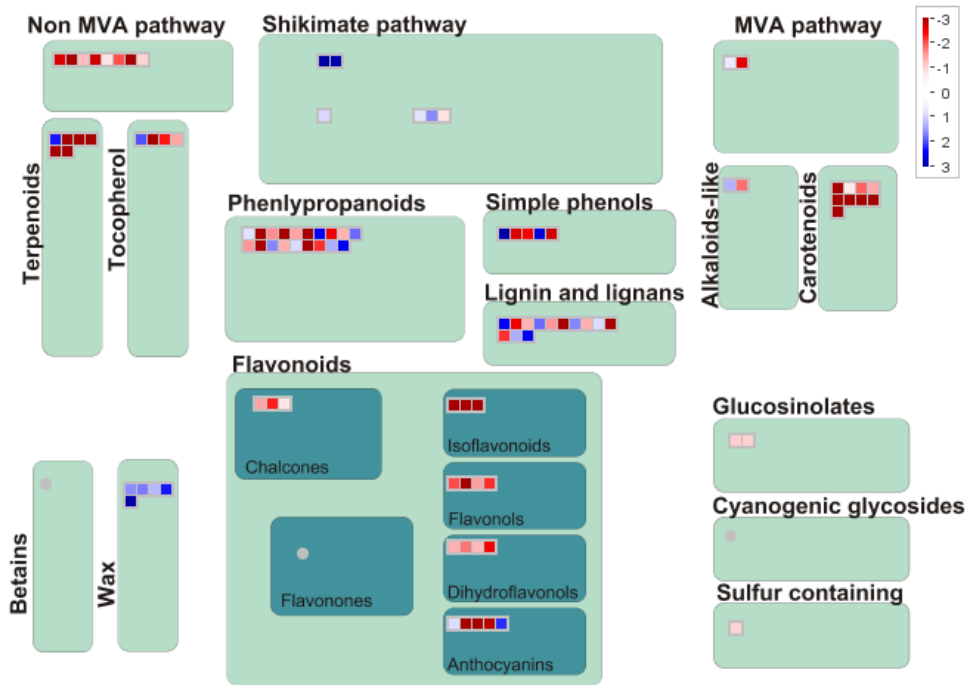

Fig L

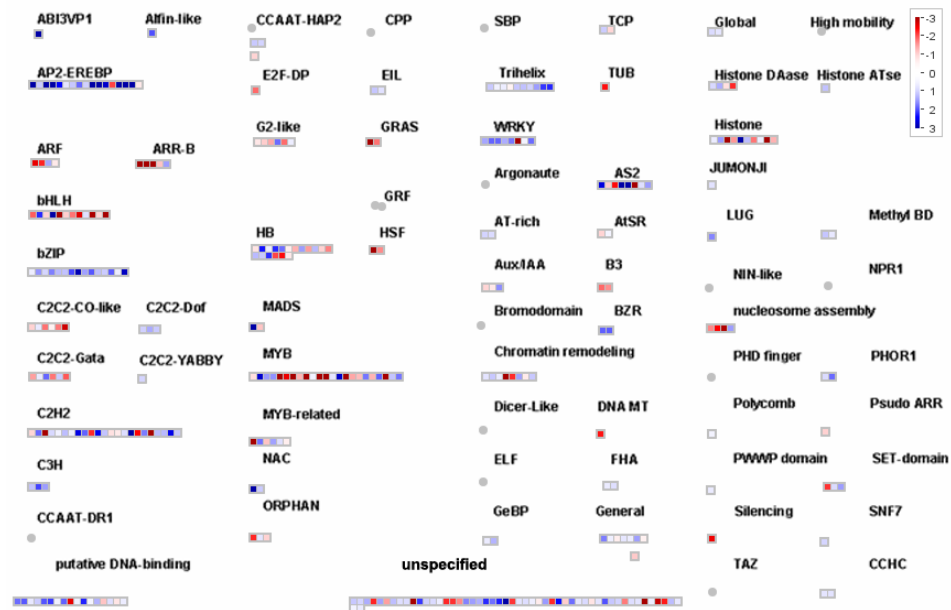

Supplement: pone.0219272.s003.pdf [file pone.0219272.s003.pdf]
