# Supplementary material for: Global gene expression analysis in etiolated and de-etiolated seedlings in conifers
Source: PubMed Central journal article supplement (PMC6611632; doi:10.1371/journal.pone.0219272), 2019-07-05
Supplement: pone.0219272.s004.pdf [file pone.0219272.s004.pdf]

CLUSTAL O(1.2.4) multiple sequence alignment - CRYPTOCHROME 1  
 Conserved amino acids within conifers and within angiosperms are marked with the box.

|               |                                                                      |     |
|---------------|----------------------------------------------------------------------|-----|
| P.abies       | -----MSTNCSIVFRRDLRVEDNPALAAAGVRAGAVIVLYIWSPEEEGQYYPGRVSR            | 52  |
| P.sylvestris  | -----                                                                | 0   |
| A.thaliana    | MSGSVSGCGSGGCSIVFRRDLRVEDNPALAAAVRAGPVIALFVWAPEEEGHYHPGRVSR          | 60  |
| G.max         | -----MSGGGGSIVFRRDLRIEDNPALTAGVRAGAVVAVFVWAPEEEGQYYPGRVSR            | 53  |
| P.trichocarpa | -----MSGGGCSIVFRRDLRVEDNPALAAAGVRAGAVVAVFVWAPEEEGHYYPGRVSR           | 53  |
| E.grandis     | -----MSGCSIVFRRDLRVEDNPALAAAGVRSVLA VFIWAPEEEGAYYPGRVSR              | 51  |
|               |                                                                      |     |
| P.abies       | WWLKQSLAHL DSSLRNLGARLITKRSTNSISAILQVVQATGATQLFYNHLYDPLSLVRDH        | 112 |
| P.sylvestris  | -----                                                                | 0   |
| A.thaliana    | WWLKNSLAQLDSSLRSLGTCLITKRSTDSVASLDDVVKSTGASQIFFNHLYDPLSLVRDH         | 120 |
| G.max         | WWLKNSLAHLHSSLRNLGTPLITKRSTDTLSSLLEVVKSTGATQLFFNHLYDPLSLVRDH         | 113 |
| P.trichocarpa | WWLKQSLAHL DSSLRSLGTSLVTKRSTDSVSSLLEVVKSTGATQLLFNHLYDPLSLVRDH        | 113 |
| E.grandis     | WWLKHSLAHL DSSLRSLGTCLITRRSTDSVSSLLELVKSTGATQLFFNHLYDPLSLVRDH        | 111 |
|               |                                                                      |     |
| P.abies       | KLKQDLSSRGILVRSFNDDLLEPWEVNDDEEGHAFSTFQDYWNKCLNMPYDPLAPLLPPK         | 172 |
| P.sylvestris  | -----INDEEGHAFSTFQAYWNKCLNMPYDPSAPLLPPK                              | 34  |
| A.thaliana    | RAKDVLTAQGI AVRSFNADLLLEPWEVTDELGRPFMFAAFWERCLSMYPDPESPLLPK          | 180 |
| G.max         | RAKEVLTAQGITVRSFNADLLLEPWEVNDAGHRPFTTFAAFWERCLSMYPDPESPLLPK          | 173 |
| P.trichocarpa | RAKEILTAQGITVRSFNADLLLEPWDVNDAGQRPFTTFDTFWERCLSMFPDPEAPLLPPK         | 173 |
| E.grandis     | RAKEVLNAQGINVHSFNADLLLEPWEVNDQGHPTTFAGFWKCLSMYPDPESPLLPK             | 171 |
|               | :.* **:* :* :***:**:*****                                            |     |
|               |                                                                      |     |
| P.abies       | RIVAGEVSNCP SDDINLEDESEKASNALLARAWSPGWS SADKAL TAFINGPLIDMALNFQ      | 232 |
| P.sylvestris  | RIVAGEVSNCP SDDLKLEDESEKASNALLARAWSPGWS SADKAL TTFINGPLIDMALNFQ      | 94  |
| A.thaliana    | KIISGDVSKCVADPLVFEDESEKASNALLARAWSPGWSNGDKAL TTFINGPLIEMSKNFR        | 240 |
| G.max         | RIIPGDASRCPSDTLLFEDELEKASNALLARAWSPGWSNANKAL TTFINGPLIEMSKNFR        | 233 |
| P.trichocarpa | RIISGDVSRCP SVTLVFEDESEKASNALLARAWSPGWSNADRAL TTFINGPLIEMSKNFR       | 233 |
| E.grandis     | RIISGDVSRCPSEALVFEDESEKASNALLARAWSPGWSNADKAL TTFVNGPLIEMSKNFR        | 231 |
|               | :*:*:*:*:*:*:*:*:*:*:*:*:*:*:*:*:*:*:*:*:*:*:*:*:*:*:*:*:*:*:*:*:*:* |     |
|               |                                                                      |     |
| P.abies       | KADSATTSLLSPHLHFGELSVKVFHLVRIROVLWANEGNTSGEQSVNLFKLSIGLREYS          | 292 |
| P.sylvestris  | KADSATTSLLSPHLHFGELSVRKVFHLVRIROVLWANEGNTSGEQSVNLFKLSIGLREYS         | 154 |
| A.thaliana    | KADSATTSLLSPHLHFGELSVRKVFHLVRIKOVANEGNEAGEE SVNLFKLSIGLREYS          | 300 |
| G.max         | KADSATTSLLSPHLHFGELSVKVFHLVRIKOVLANEGNKAGEE SVNLFKLSIGLREYS          | 293 |
| P.trichocarpa | KADSATTSLLSPHLHFGELSVRKVFHLVRIKOVLANEGNRAGEE SVNLFKLSIGLREYS         | 293 |
| E.grandis     | KADSATTSLLSPHLHFGELSVRKVFHLVRIKOVLANEGNKAGEE SVNLFKLSIGLREYS         | 291 |
|               | *****:*****:**:*****:**:* ***** :**:******:*****                     |     |
|               |                                                                      |     |
| P.abies       | RYLSFNFPSSSHEKPLLSHLNYPWRVDSDFKSNRQGRGTGYPLVDAGMRELWATGWLHDR         | 352 |
| P.sylvestris  | RYLSFNFPSSSHERPLLSHLNYPWRVDRDYFKSNRQGRGTGYPLVDAGMRELWATGWLHDR        | 214 |
| A.thaliana    | RYISFNHPYSHERPLLGHLKFFPWAVDENYFKANRQGRGTGYPLVDAGMRELWATGWLHDR        | 360 |
| G.max         | RYISFNHPYSHERPLLGHLKFFPWVVEGYFKANRQGRGTGYPLVDAGMRELWATGWLHDR         | 353 |
| P.trichocarpa | RYLSFNHPCTHERPLLGHLKFFPWVVEGYFKANRQGRGTGYPLVDAGMRELWATGWLHDR         | 353 |
| E.grandis     | RYMSFNHPYSHERPLLGHLKFFPWVVEGHFKANRQGRGTGYPLVDAGMRELWATGWLHDR         | 351 |
|               | **:*:*:*:*:*:*:*:*:*:*:*:*:*:*:*:*:*:*:*:*:*:*:*:*:*:*:*:*:*:*:*:*   |     |
|               |                                                                      |     |
| P.abies       | IRVVVSSFFVKVLQLPWRWGMKYFDWDTLLDADLECDALGWQYISGCLPDGREMDRIDNPQ        | 412 |
| P.sylvestris  | IRVVVSSFFVKVLQLPWRWGMKYFDWDTLLDADLECDALGWQYISGCLPDGREMDRIDNPQ        | 274 |
| A.thaliana    | IRVVVSSFFVKVLQLPWRWGMKYFDWDTLLDADLES DALGWQYITGTLPDSREFDRIDNPQ       | 420 |
| G.max         | IRVVVSSFFVKVLQLPWRWGMKYFDWDTLLDADLES DALGWQYISGSLPDGREIDRIDNPQ       | 413 |
| P.trichocarpa | IRVVVSSFFVKVLQLPWRWGMKYFDWDTLLDADLES DALGWQYITGTLPDSREFDRIDNPQ       | 413 |
| E.grandis     | IRVVVSSFFVKVLQLPWRWGMKYFDWDTLLDADLES DALGWQYISGTIPDGREFDRIDNPQ       | 411 |
|               | *****:*****:**:*****:**:* ***** :* :**:******:*****                  |     |
|               |                                                                      |     |
| P.abies       | FEGYKFDFA GEYVRRWLP ELARLPTEWIHHPWDAPRAVLQAAGVELGSNYPLPIVEISTA       | 472 |
| P.sylvestris  | FEGYKFDFA GEYVRRWLP ELARLPQWIHHPWDAPQAVLQSAGVELGSNYPLPIVEISTA        | 334 |
| A.thaliana    | FEGYKFDENGEYVRRWLP ELSRLPTDWIHPWNAPESV/LQAAGIELGSNYPLPIVGLDEA        | 480 |
| G.max         | FEGYKFDENGEYVRRWLP ELARLPTEWIHHPWNAPESV/LQAAGIELGSNYPLPIVGLDAA       | 473 |
| P.trichocarpa | FEGYKFDENGEYVRRWLP ELARLPTEWIHHPWNAPESV/LQAAGIELGSNYPLPIVGLDAA       | 473 |
| E.grandis     | FEGYKFDENGEYVRRWLP ELARLPTEWIHHPWNAPESV/LQAAGIELGSNYPLPIVGLDAA       | 471 |
|               | ***** *****:*****:**:*****:**:* *****:*****:**:*****                 |     |
|               |                                                                      |     |
| P.abies       | KERLQEGLSMWWQREADARASLENGTEEGLGCSLENANA--SLPD--QMDVDREPVRRNT         | 528 |
| P.sylvestris  | KERLQDALSEMWWQREAAARASLENGTEEGLGCSLENANA--SLSE--NMDVDREPVRRNT        | 390 |
| A.thaliana    | KARLHEALSQMWQLEAASRAA IENGSEEGLD SAEVEEAPIEFPRDITMEETEPT----R        | 536 |
| G.max         | KTRLLEALSQMWQLEAASRAA IENGTEEGLGDSSE--SVPAAFPQDMQMEETHEPVRNRP        | 531 |
| P.trichocarpa | KVRLEALSQMWQLEAASRAA IENGTEEGLGDSSE--SAPFAFPEDIHMEENHEPVRNRP         | 531 |
| E.grandis     | KVRLQDALSIMWQHEATSRAA IENGTEEGLGDSSE--SAPIAFPQDIQMEENHETMRNRP        | 529 |

\* \*\* : \*\* \*\*\* \*\* :\*\*\*:\*\*\*:\*\*\*\*\* \* .. : \*:

|               |                                                                |     |
|---------------|----------------------------------------------------------------|-----|
| P.abies       | HLAARSQDDQLVPSISNAVQRAYVGYTLSSQAAS-SSPSEQAEVPSNTDSGIASAASSQQF  | 587 |
| P.sylvestris  | GFAARSQDDQLVPSISNMVHRADVITYTLSSQAAS-SARSEQAEVPSNRDSGTASAASSQQF | 449 |
| A.thaliana    | LNPNRRYEDQMVPISITSSLRPEEDEFSSSLNLRNSVGDSSRAEVPRNMVNTNQAQQ---R- | 592 |
| G.max         | LPVARRYQDQMVPISITSSLLRVEEETSSDLRHSAESSRAEVPTANAQQNV-G---V-     | 586 |
| P.trichocarpa | PATNRRYEDQMVPISITSSFLRIEDEETS-DVRNST-GDGRAEVPRDVNVNQEP RR---D- | 585 |
| E.grandis     | PGPVERRYEDQMVPISITSLVRADEEETS-GIQNSI-GDTRA EVPANVNLNEEPRR---D- | 583 |

: \*\* :\*\*\*: : . :\*\*\*\*

|               |                                                              |     |
|---------------|--------------------------------------------------------------|-----|
| P.abies       | LGQSTWSMTRGLIEDL--PNVTNDYPMQVLDQNESEHSTADSSSILRGRDDMS\$GGIVP | 645 |
| P.sylvestris  | LGQSTWSMTRGLIEDL--PNVISHYPMQALDEQSEHSTADSSSILRVRDDTSSGGIVP   | 507 |
| A.thaliana    | -----RAEPAS---NQVTAMIPEFNIR-IVAESTE-DSTAESSSS---GRRERSGGIVP  | 638 |
| G.max         | -----TLNERMLQ-TTNRNAQTQYNTTMELRNVAE-DSAVESSSG---TRRERDGGVVP  | 635 |
| P.trichocarpa | -----ALNQGQFVQTVRNNTALSPFNISRGLTN-VE-DSTAESSSS---GRRERDGGIVP | 634 |
| E.grandis     | -----TLNEGQVFQQLRPNTQPMYNFSPGLHNDAE-DSTAESSST---GRRERDGGVVP  | 633 |

: : : \* .\*\*\*:\*\*\* .\*\*:\*\*

|               |                                                               |     |
|---------------|---------------------------------------------------------------|-----|
| P.abies       | VWSQSLSQSC-----                                               | 655 |
| P.sylvestris  | VWSQSLSGHSQQFP EEGTVPGTAESSLQQQLHNHSMGTWRHGHNQGAVQMSKPVCFEFNF | 567 |
| A.thaliana    | EWSP---GYSEQFPSEENGIGGGSTSSYLQNHHEILNWRRLSQTG-----            | 681 |
| G.max         | VWSPPASSYSEQFVGEENGITNSSSFLQRHPQSHQMLNWRQLPQTG-----           | 681 |
| P.trichocarpa | VWSPPTSSYSEQFVGGDNGIGATSSYLQRHPQSHQIINWRRLSQTG-----           | 680 |
| E.grandis     | VWSPPTSSYSYDQIAGDENGIGNGSAFLQRHPQSHQIINWRRLSQTG-----          | 679 |

\*\*

|               |       |     |
|---------------|-------|-----|
| P.abies       | ----- | 655 |
| P.sylvestris  | KYAVL | 572 |
| A.thaliana    | ----- | 681 |
| G.max         | ----- | 681 |
| P.trichocarpa | ----- | 680 |
| E.grandis     | ----- | 679 |

**Sequence details**

|               |                                                                                                    |
|---------------|----------------------------------------------------------------------------------------------------|
| P.abies       | MA_10428291p0010 ( <a href="http://congenie.org/">http://congenie.org/</a> )                       |
| P.sylvestris  | AFV79203.1 ( <a href="https://www.ncbi.nlm.nih.gov/">https://www.ncbi.nlm.nih.gov/</a> )           |
| A.thaliana    | AT4G08920.1 ( <a href="https://www.arabidopsis.org/">https://www.arabidopsis.org</a> )             |
| G.max         | Glyma.04G101500.1 ( <a href="https://phytozome.jgi.doe.gov/">https://phytozome.jgi.doe.gov/</a> )  |
| P.trichocarpa | Potri.005G164700.2 ( <a href="https://phytozome.jgi.doe.gov/">https://phytozome.jgi.doe.gov/</a> ) |
| E.grandis     | Eucgr.F00326.1 ( <a href="https://phytozome.jgi.doe.gov/">https://phytozome.jgi.doe.gov/</a> )     |

CLUSTAL O(1.2.4) multiple sequence alignment - PIF3

|              |                                                                        |     |
|--------------|------------------------------------------------------------------------|-----|
| A.thaliana   | MPLFELFRLTKAKLESAQDRNPSPVDEVVELVWENGQISTQSQSSRSRNIPPPQANSSR            | 60  |
| P.taeda      | -----                                                                  | 0   |
| P.abies      | -----                                                                  | 0   |
| P.sylvestris | -----                                                                  | 0   |
|              |                                                                        |     |
| A.thaliana   | AREIGNGSKTTMVDEI PMSVPSLMTGLSQDDDFVPWLNHHPSLDGYCSDFLRDVS PVTV          | 120 |
| P.taeda      | -----MSHYRPSLTSFIPK----AS-----                                         | 16  |
| P.abies      | -----                                                                  | 0   |
| P.sylvestris | -----                                                                  | 0   |
|              |                                                                        |     |
| A.thaliana   | NEQESDMAVNQ--TAFPLFQRRK----DGNESAPAASSSQYNGFQSHSLYGS DRARDLPS          | 174 |
| P.taeda      | -----LQVKTYIFSFYTLIHCYGFAGPRRGASTSRLIQTGFPPSR-----QKHK                 | 62  |
| P.abies      | -----                                                                  | 0   |
| P.sylvestris | -----                                                                  | 0   |
|              |                                                                        |     |
| A.thaliana   | QQTNPDRFT-----QTQEPLITSNKPSLVNFSHFLRPATFAKTNNN-LHDTKEKSPQS             | 227 |
| P.taeda      | DQKTP-HFALRIMAQKCEPGFLVNNNSALWDDDED-----ALNRNYNYNYTDLWGGLPLS           | 116 |
| P.abies      | -----MAHKCLEPSFLVHNPLVWDDDED-----ALNRNYNYNYTDLWGGLPLS                  | 43  |
| P.sylvestris | -----MAQKCSEPGFLVNNNSALWDDDED-----ALNRNYNYNYTDLWGGLPFS                 | 43  |
|              | : ** : : : * : ..           : : . * * * * * * *                        |     |
|              |                                                                        |     |
| A.thaliana   | PPNVFQTRVLGAKDSEDKVLNESVASATPKDNQKACLISEDSCRKQSEKAVVCS---S             | 284 |
| P.taeda      | SS-AP--ARTSAEDSRPKVVAASEAVE--SDYG--RVNK--N-NNTVSADTQLSCETAAT           | 166 |
| P.abies      | SS-VATTARTSAEDSRPEVAVSEALE--SDYG--RLNN--NNNNNVSADTQLSCETAAT            | 96  |
| P.sylvestris | SS-APATARTSAENSRPKVVAASEAVE--SDYG--RVNN--K-NNNVSADTQLSCETAAT           | 95  |
|              | . * : : * . * *           : . . . : : : : * . : :                      |     |
|              |                                                                        |     |
| A.thaliana   | VGSGNSLDGPSESPSL---SLKRKHSNIQDIDCHSEDEVVEESGDGRKEAGPSRTGLGSKR          | 341 |
| P.taeda      | SSSGGSMSSPSKSNKVIKSSKNKVLMTGTDIECQSQ-----                              | 202 |
| P.abies      | SSSGGSMSSPSNGKVIKSSKKKVLMTGTDIECQSQAQEDSGENFKQCST--GTSSSKR             | 154 |
| P.sylvestris | SSSGGSMSSPSKSNKVIKSSKNKVLMTGTDIECQSQAQEDSGENFKQCST--GTS-SKR            | 152 |
|              | **.*:..**:. :       * : :       . :****:*                              |     |
|              |                                                                        |     |
| A.thaliana   | SRSAEVHNLSERRRRDRINEKMRALQELIPNCNKVDKASMLDEAIEYLKSLQLQVQIMSM           | 401 |
| P.taeda      | -----RRRNRINEKMKALQNLIPNSNKTDKASMLDEAIEYLKSLQLQVQIMSM                  | 250 |
| P.abies      | SRAAEVHNLSEKRRRRNRINEKMKALQNLIPNSNKTDKASMLDEAIEYLKSLQLQVQIMSM          | 214 |
| P.sylvestris | SRAAEVHNLSEKRRRRNRINEKMKALQNLIPNSNKTDKASMLDEAIEYLKSLQLQVQIMSM          | 212 |
|              | ***:*****:***:****.*.*****.*****.*****:*                               |     |
|              |                                                                        |     |
| A.thaliana   | ASGYLPPAVMFPP---GMGHYPAAAAAMA---MGMGMPYAMGLPDL SRGGSSVNH--             | 451 |
| P.taeda      | RSGIDLSSMRWLAQMPHLQIQQMPKACMAIDQHAGVPI SMPVGSGLINTNQGSEKRPLPL          | 310 |
| P.abies      | RSGIDISSMRWLAQMPHLQIQQMPKACMTTDQHAGVSI SMPVGSGLMNTNQGSEKRPLPL          | 274 |
| P.sylvestris | RSGIDLSSMRWLAQMPHLQIQQMPKARMAIDQHAGVPI SMPVGSGLINTNQGSEKRPLPL          | 272 |
|              | ** :           :           : : * * :           : : .** . * : : : * . . |     |
|              |                                                                        |     |
| A.thaliana   | GPQFQVSGMQQPVMAGIPR--VSGGGIFAGSSTINGSTRDLSGSKDQTTNNNSNLKP              | 509 |
| P.taeda      | HDLYKSGALCNTAIPINLSSVRIDDHHSCKMDHPQGHFTLPQLPT----TTQEVHSAL-S           | 365 |
| P.abies      | HDLYISGALGNTAIPINLPSARIDDHQSKMDRPPQGHFTLPQLPT----TTQEVHSAL-S           | 329 |
| P.sylvestris | HDLYNSGALGNTAIPINLSSVRIDDHHSCKMDHPQGHFTLPQLPT----TTQEVHSAL-S           | 327 |
|              | : . : : : : : :       : . .       . * : : : *       ** : : * *         |     |
|              |                                                                        |     |
| A.thaliana   | IKRKQGSSDQFCGSS 524                                                    |     |
| P.taeda      | LQEK----- 369                                                          |     |
| P.abies      | LQEK----- 333                                                          |     |
| P.sylvestris | LQEK----- 331                                                          |     |
|              | : : . *                                                                |     |

Sequence details

|              |                                                                                                                     |
|--------------|---------------------------------------------------------------------------------------------------------------------|
| P.abies      | MA_26114p0010 ( <a href="http://congenie.org/">http://congenie.org/</a> )                                           |
| P.sylvestris | PSY00020194 ( <a href="https://bioinformatics.psb.ugent.be/plaza/">https://bioinformatics.psb.ugent.be/plaza/</a> ) |
| A.thaliana   | AT1G09530.2 ( <a href="https://www.arabidopsis.org">https://www.arabidopsis.org</a> )                               |
| P.taeda      | PITA_000009665 ( <a href="http://congenie.org/">http://congenie.org/</a> )                                          |

CLUSTAL O(1.2.4) multiple sequence alignment - HY5

```

P.abies      MQAIAPDFSG----SATGDKLITSSSGDPHEEAMNECVNESDDDIRRVPEMGVQTGFVM-      55
P.taeda      MQGTAPDLSG----SATGDKFFTSSSGDLHEEARNECVNESDDDIRRVPEMGVQTGVVV-      55
A.thaliana   MQEQATSSLAASSLPSSSERS---SSSAPHLE--IKEGIESDEEIRRVPFEGGEAVGKET      55
P.sylvestris MQDTAASTST--QHQSTSEKSSSSAAPAQFRQ--AKDAIESDDDIRRVPEMGGMQAGPST      56
            ** * .      ::::      :      :      :      :      *****:

P.abies      --HSDLAVKTESERASASGGSQRRRGRTPADKEHKRLKRLLRNRVSAQQARERKKAYLNE      113
P.taeda      --NSDLVVKTESERGLSGSGSQRRRGRTPADKEHKRLKRLLRNRVSAQQARERKKAYLNE      113
A.thaliana   SGREGSATGQERTQATVGVESQRKRGRTPAEKENKRLKRLLRNRVSAQQARERKKAYLSE      115
P.sylvestris CVPMLRD---NPQPSTGVVAHRKRGRAPADKEHKRLKRLLRNRVSAQQARERKKAYLND      112
            .      :      :*****:*****:*****:*****:*****:

P.abies      LETKANELQQKNSELEERVSTLQENFMRLRQVLKNMTAKNKGGFVEAEG---      163
P.taeda      LETKAKELQQRNSELEERVSTLQENYMLRQVLKNMTAKNKGGVGEVEG---      163
A.thaliana   LENRVKDLENKNSELEERLSTLQENQMLRHILKNTTGNKRGGGGGSNADASL      168
P.sylvestris LETRVKEIEHKNSELEERLSTLQENHMLRQILKNTTMMKKKSGNSGAET---      162
            **.::::*****:***** *****:*** * :*:.*
    
```

Sequence details

```

P.abies      MA_41006p0010 (http://congenie.org/)
P.sylvestris PSY00021926 (https://bioinformatics.psb.ugent.be/plaza/)
A.thaliana   AT5G11260.1 (https://www.arabidopsis.org)
P.taeda      PITA_000075685 (http://congenie.org/)
    
```
